# Supplementary material
Source: Research Square preprint supplement (doi:10.21203/rs.3.rs-8873692/v1)
Supplement: Supplementary file 1 [file 6fe0fe0ff623fc5823f5b1b1.docx]

|  | 2021 | | 2022 | | 2023 | | 2024 | | 2025 | |
| --- | --- | --- | --- | --- | --- | --- | --- | --- | --- | --- |
| Locality/Species | **A** | **B** | **A** | **B** | **A** | **B** | **A** | **B** | **A** | **B** |
| 1-Petržalka | +* | - | +** | - | +* |  | +** | +* | +** | +** |
| 2- Jarovce | +* | - | +** | - | +* |  | +** |  | +** |  |
| 3- Rusovce | +* | - | +** | - | +* |  | +** |  | +** |  |
| 4- Čunovo |  | - |  | - |  |  |  |  |  |  |
| 5- Podunajské Biskupice | +* | - | +** | - | +* |  | +** |  | +** |  |
| 6- Vrakuňa | +* | - | +** | - | +* | +* | +** | +** | +** | +** |
| 7-Ružinov/Nivy | +* | - |  | - | +* |  | +** | +** | +** | +** |
| 8-Staré mesto | +* | - | +** | - | +* |  | +** |  | +** |  |
| 9-Nove mesto | +* | - | +** | - | +* |  | +** |  | +** |  |
| 10-Rača | +* | - | +** | - | +* |  | +** |  | +** |  |
| 11-Vajnory | +* | - | +** | - | +* |  | +** |  | +** |  |
| 12-Záhorská bystrica | +* | - | +** | - | +* |  | +** |  | +** |  |
| 13-Lamač | +* | - | +** | - | +** | +* | +** | +** | +** | +** |
| 14-Dúbravka | +* | - | +** | - | +* |  | +** |  | +** |  |
| 15-DNV | +* | - | +** | - | +* |  | +** |  | +** |  |
| 16-Devín | +* | - | +** | - | +* |  | +** |  | +** |  |
| 17-Karlová Ves | +* | - | +** | - | +* |  | +** |  | +** |  |

Table 1.: Findings of larvae and adults of *Ae. japonicus*/*koreicus* (**A**) and *Ae. albopictus* (**B**) in different localities in Bratislava

(*introduced, ** established)
